# Supplementary material
Source: Springer Nature journal article supplement (https://www.springermedizin.de/resource/supplementary/12936_2006_335_MOESM1_ESM.pdf/9547578)

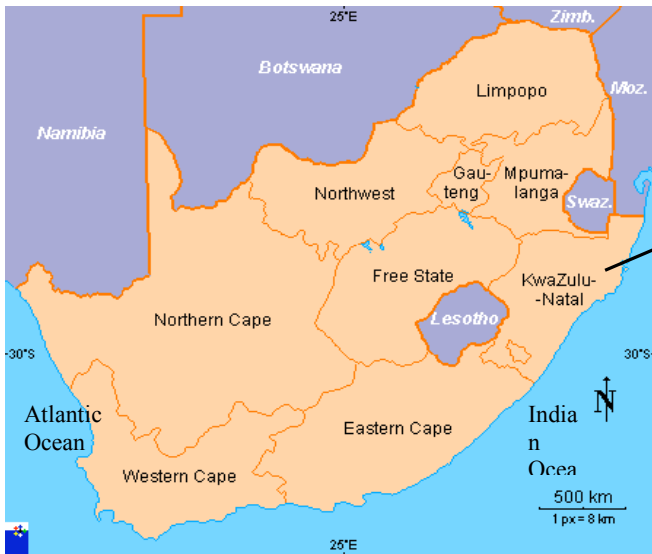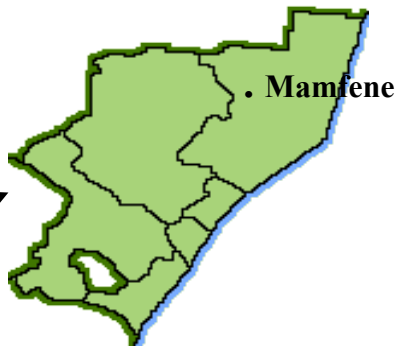

KwaZulu/Natal Province

South Africa

Supplement: MOESM1 [file 9547578]
